# Supplementary material
Source: PubMed Central journal article supplement (PMC4567705)

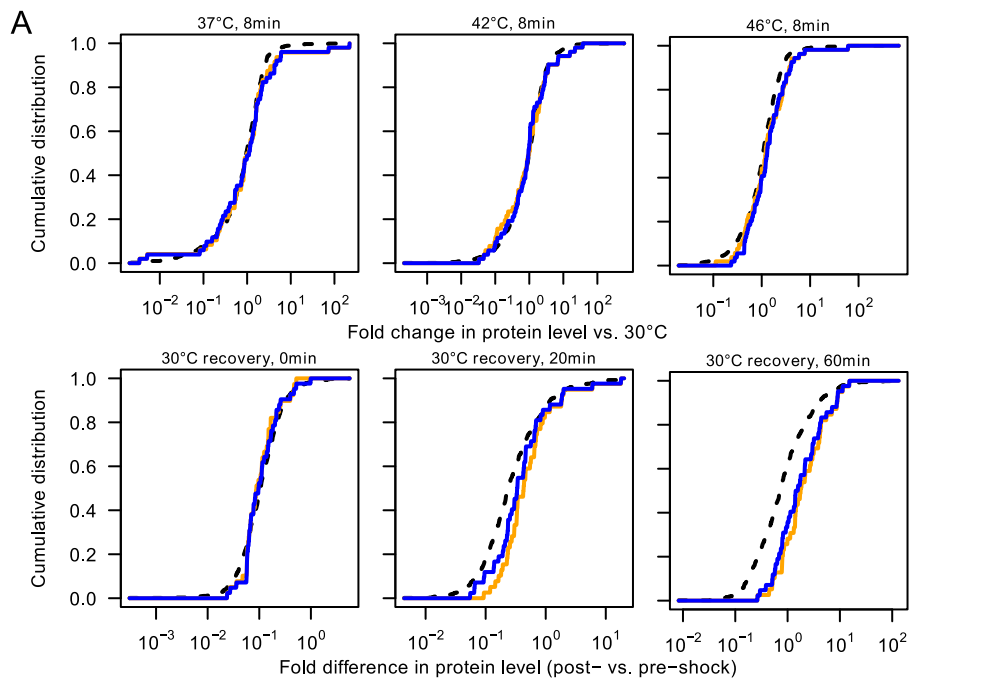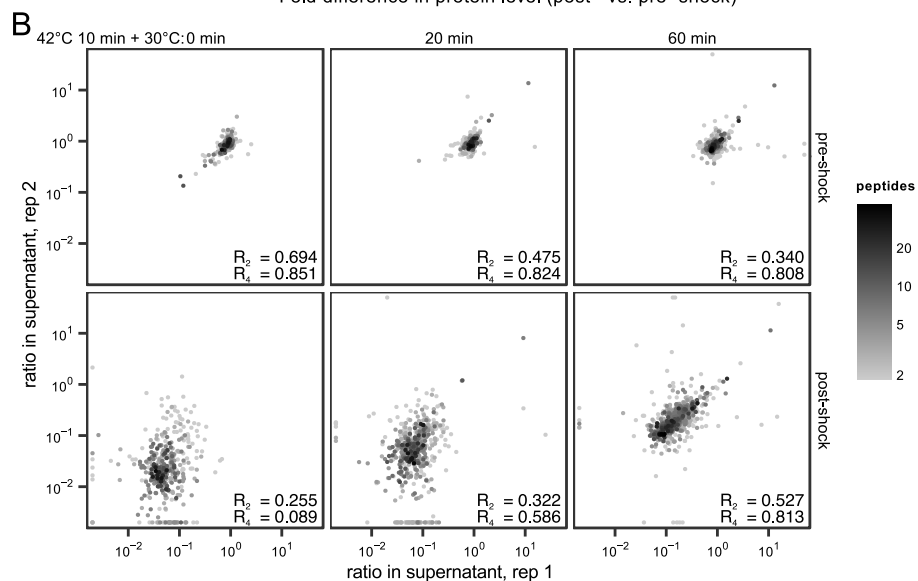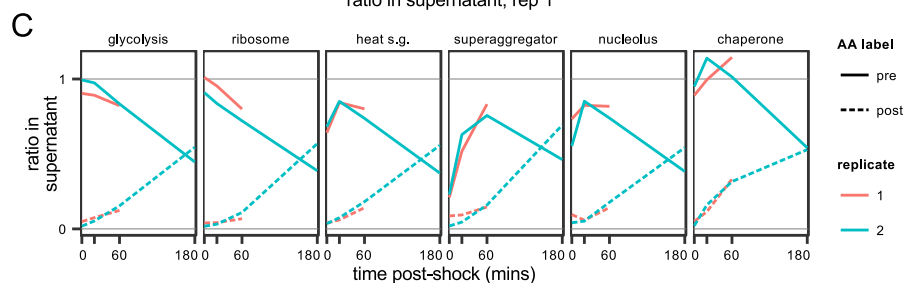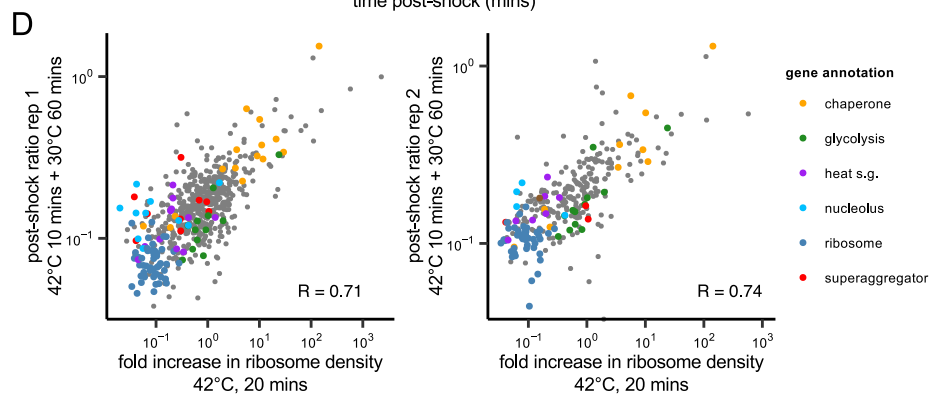

Supplement: NIHMS718970-supplement-4.pdf [file NIHMS718970-supplement-4.pdf]
